# Supplementary material
Source: Springer Nature journal article supplement (https://www.springermedizin.de/resource/supplementary/12888_2011_875_MOESM1_ESM.pdf/9478432)

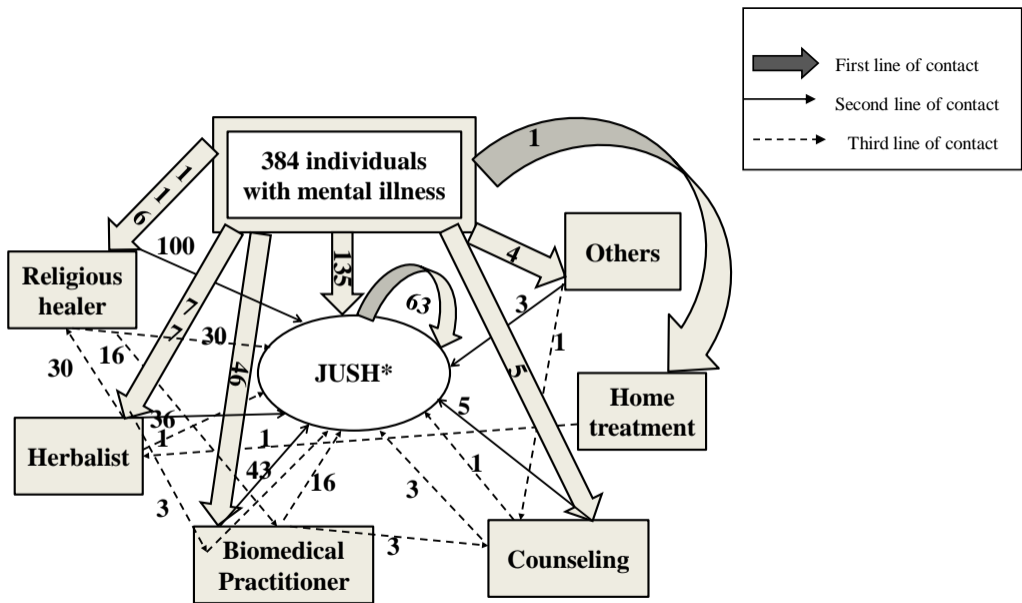

\* Jimma university specialized hospital

Supplement: MOESM1 [file 9478432]
